# Supplementary material
Source: MDPI journal article supplement (https://www.mdpi.com/2073-4395/11/10/1959)
Supplement: s1 [file s1]

Archive with 2 entries (2 files):
- Database S1.xlsx
- Survey S1.pdf
