# Supplementary material
Source: MDPI journal article supplement (https://www.mdpi.com/2073-4395/11/10/1959)
Supplement: s1 [file s1 › Database S1.xlsx]

## Sheet: Respuestas de formulario 1
	Q1	Q2	Q3	Q4	Q5 (Marque solo una opción siendo 1 muy bajo o 7 muy alto)	Q6	Q7	Q8	Q9	Q10	Q10. 1	Q11	Q12	Q13	Q13. 1	Q13. 2	Q14	Q15.1	Q15. 2	Q15. 3	Q15. 4	Q15. 5	Q15. 6	Q15. 7	Q15. 8	Q15. 9	Q15. 10		Q16. Next, we are going to show you a list of agroecological practices. Indicate all agroecological practices that you have already adopted.	Q16.2.1	Q16.2.2	Q16.2.3	Q16.2.4	Q16.2.5	Q16.2.6	Q16.2.7	Q16.2.8	Q16.2.9	Q16.2.10	Q16.2.11	Q16.2.12	Q16.2.13	Q16.2.14	Q16.2.15	Q16.2.16	Q16.2.17	Q16.2.18	Q16.2.19	Q16.2.20
1	Fruit trees (fruit cultivation)	Conventional	Intensive	> 70 hectares	6	No	31 to 40 years	Between 1 and 2 persons	Between 1 and 2 persons	Operating technician	Yes	Yes	Other family	Yes	There are no young people in the field	Yes		7	7	4	3	7	2	2	3	7	7	4.9	Production of organic fertilizers, Split fertilization (Application of chemical and organic fertilizers with several operations.), Biofertilizer (Application of live microorganisms to seeds, plant surfaces or soil), Reduction of the use of inputs harmful to the environment, Create plant barriers around their crops, plots or the farm itself, Irrigation of crops (by drip, by controlled deficit irri…	1	1	1	0	1	0	1	0	0	0	1	1	1	1	1	1	1	0	0	0
2	Vineyard	Ecological	Extensive	3 to 5 hectares	3	No	11 to 20 years	Between 1 and 2 persons	Between 1 and 2 persons	Purchase (owned by you)	Yes	No	Other family	Yes	Very hard work and low prices	No	Environmentally friendly practices	6	6	5	6	5	6	6	2	3	3	4.8	Production of organic fertilizers, Organic fertilization (Application of fertilization exclusively organic or mixed with inorganic), Reduction of the use of inputs harmful to the environment, Integration of different crops in rotations (including cover crops), Create plant barriers around their crops , plots or the same farm, Conservation agriculture (soil protection by covering the soil with pla…	1	1	0	0	0	1	1	0	0	0	0	0	1	0	1	1	0	1	0	0
3	Horticultural (vegetable cultivation)	Ecological	Extensive	3 to 5 hectares	6	No	41 to 50 years	Between 1 and 2 persons	Between 1 and 2 persons	Family	No	Yes	Son/s or daughter/s	Yes	Economical: most farms are not profitable	Yes	Everything that has to do with agriculture and the environment	6	6	7	7	5	4	6	5	7	7	6	Biofertilizer (Application of live microorganisms to seeds, plant surfaces or soil), Organic fertilization (Application of fertilization exclusively organic or mixed with inorganic), Reduction of the use of inputs harmful to the environment, Integration of different crops in rotations (including crops coverage), Create plant barriers around their crops, plots or the same farm, Polyculture. Divers…	0	0	1	1	1	1	1	0	1	1	1	1	0	1	1	1	0	1	1	1
4	Horticultural (vegetable cultivation)	Ecological	Extensive	3 to 5 hectares	3	No	0 to 10 years	Between 1 and 2 persons	Between 1 and 2 persons	Rental	No	No	Other family	Yes	Lack of interest and low expectations for the future for young people	I don't know	Respectful with the environment, with the ecological system.	4	4	5	4	5	3	3	5	4	4	4.1	Production of organic fertilizers, Integration of different crops in rotations (including cover crops), Create plant barriers around their crops, plots or the farm itself, Polyculture. Diversification of cultivable species on the same farm, Irrigation of crops (by drip, by controlled deficit irrigation and / or support), Conservation agriculture (soil protection by covering the soil with plant re…	1	0	0	0	0	1	1	0	1	1	0	1	0	1	0	0	0	0	0	0
5	Fruit trees (fruit cultivation)	Ecological	Intensive	11 to 15 hectares	4	No	31 to 40 years	Between 1 and 2 persons	Between 1 and 2 persons	Rental	No	Yes	Son/s or daughter/s	Yes	Due to lack of interest and little help from the administrations	Yes	Those that allow food to be produced without using chemically synthesized pesticides or herbicides or transgenic, maintaining the regenerative capacity of the soil, its fertility and the balance and biodiversity of the ecosystem	1	1	3	2	2	2	2	2	2	2	1.9	Organic fertilization (Application of exclusively organic fertilization or mixed with inorganic), Reduction of the use of inputs harmful to the environment, Polyculture. Diversification of cultivable species on the same farm, Irrigation of crops (by drip, by controlled deficit irrigation and / or support), Conservation agriculture (soil protection by covering the soil with plant remains from a pr…	0	0	0	1	1	0	0	0	1	1	0	1	0	1	1	1	0	1	1	0
6	Fruits and vegetables	Conventional	Extensive	< 2 hectares	2	No	0 to 10 years	Between 1 and 2 persons	Between 1 and 2 persons	Family	No	Yes	Father and / or mother	Yes	It does not give to live and is very sacrificed	No		1	6	3	1	5	2	1	1	5	5	3	Reduction of the use of inputs that are harmful to the environment, Irrigation of crops (by drip, by controlled deficit irrigation and / or support)	0	0	0	0	1	0	0	0	0	1	0	0	0	0	0	0	0	0	0	0
7	Extensive crops (cereals, leguminous plants, fodder, ornamental, hop and so on)	Conventional	Extensive	> 70 hectares	5	No	0 to 10 years	Between 1 and 2 persons	Between 1 and 2 persons	Rental, Purchase (owned by you) and familiar	No	No	Father and / or mother and other family	Yes	The new generations are not focused on following	Yes	They do not use synthetic chemicals	6	5	5	5	4	5	5	3	6	6	5	Split fertilization (Application of chemical and organic fertilizers with various operations.), Organic fertilization (Application of fertilization exclusively organic or mixed with inorganic), Integration of different crops in rotations (including cover crops), Use of crops resistant to any stress or crops with selected traits that enhance rhizosphere activities (for example, mycorrhizae, rhizob…	0	1	0	1	0	1	0	0	0	0	1	0	0	0	0	0	0	0	0	0
8	Horticultural (vegetable cultivation)	Combination	Extensive	6 to 10 hectares	4	Yes	11 to 20 years	Between 1 and 2 persons	Between 1 and 2 persons	Family	No	No	Brother/s or sister/s	Yes	Few births per family	Yes	Align profitability, sustainability and symbiosis	2	2	2	2	2	2	2	2	2	2	2	Production of organic fertilizers, Split fertilization (Application of chemical and organic fertilizers with several operations.), Biofertilizer (Application of live microorganisms to seeds, plant surfaces or soil), Organic fertilization (Application of exclusively organic fertilization or mixed with inorganic), Reduction of the use of inputs that are harmful to the environment, Integration of di…	1	1	1	1	1	1	1	1	1	0	1	1	1	1	1	1	1	1	0	0
9	Fruit trees (fruit cultivation) and vineyard	Conventional	Extensive	6 to 10 hectares	3	No	21 to 30 years	Between 1 and 2 persons	Between 3 to 5 persons	Family	Yes	Yes	Father and / or mother	Yes	Low prices make it not profitable to dedicate to agriculture	Yes	Respectful of the environment.	4	4	4	4	4	4	4	4	4	4	4	Split Fertilization (Application of chemical and organic fertilizers with various operations), Organic Fertilization (Application of purely organic fertilization or mixed with inorganic fertilization), Reg of crops (by drip, controlled deficit irrigation and/or support), Conservation Agriculture (land protection through land cover with plant remains of a previous crop, plant cover, ...), Biologic…	0	1	0	1	0	0	0	0	0	1	0	1	0	0	1	0	0	0	0	0
10	Fruit trees (fruit cultivation)	Conventional	Extensive	3 to 5 hectares	4	No	11 to 20 years	Between 1 and 2 persons	Between 3 to 5 persons	Family	Yes	No	Other family	Yes	The ever-increasing costs of production along with the low price paid to farmers does not make a living.	Yes	Practices that allow us to carry out the field work taking into account the resources of the land and doing a good practice with the phytosanitary ware that we apply respecting the environment.	3	7	4	5	6	3	3	7	4	4	4.6	Split Fertilization (Application of chemical and organic fertilizers with various operations), Biofertilizer (Application of living microorganisms to seeds, plant surfaces or soils), Organic Fertilization (Application of purely organic fertilization or mixed with inorganic fertilization), Reg of crops (by drip, controlled deficit irrigation and/or support), Use of natural pesticides/phany botanic…	0	1	1	1	0	0	0	0	0	1	0	0	0	0	0	1	0	0	0	0
11	Fruit trees (fruit cultivation)	Ecological	Intensive	31 to 70 hectares	7	No	31 to 40 years	Between 11 to 15 persons	Between 3 to 5 persons	Family	No	Yes	Other family	Yes	It's a sacrifice sector, high investment, investment groups and large estates that go against the replacements. No farmer wants his children to continue, too many risks at all levels due to price insecurity and more and more storms	Yes	Be respectful of your environment and produce trying to pollute as little as possible.	7	6	4	5	5	3	4	5	6	6	5.1	Split Fertilization (Application of chemical and organic fertilizers with various operations), Biofertilizing (Application of exclusively organic and/or mixed with inorganic fertilization), Organic Fertilization (Application of exclusively organic or mixed with inorganic fertilization), Integrating the use of different crops in rotations (including cover crops), Plant Regularization (for drip, fo…	0	1	1	1	1	1	1	0	0	1	1	1	1	1	1	0	0	1	1	1
12	Extensive crops (cereals, leguminous plants, fodder, ornamental, hop and so on)	Integrated ?	Intensive	< 2 hectares	2	No	21 to 30 years	More than 20 persons	Between 6 to 10 persons	Non-profit land transfer	No	No	Other family	Yes	Changes are constant in all areas of society and in all sectors.	No	All human intervention that cares for, respects and coexists in harmony with the environment and its natural environment	6	5	3	4	4	5	5	6	5	4	4.7	Organic adobe production, Biofertilizing (Application of living microorganisms to seeds, plant surfaces or soils), Organic Fertilization (Application of exclusively organic or mixed with inorganic fertilization), Reduction of the use of products that are harmful to the environment, Reg of crops (for dripping, for controlled deficit irrigation and/or support), Intercalated crops (coexistence of tw…	1	0	1	1	1	0	0	0	0	1	0	0	1	1	1	1	0	1	1	0
13	Vineyard	Integrated and ecological ?	Intensive	> 70 hectares	6	No	0 to 10 years	Between 6 to 10 persons	Between 6 to 10 persons	Operating technician	No	Yes	Other family	Yes	Hard work and poorly paid	Yes	In practice, a scam. To be able to control pests you have to enter every two or three, with the inputs that this entails.	7	6	6	6	6	6	6	5	5	5	5.8	Organic Fertilization (Application of purely organic fertilization or mixed with inorganic fertilization), Reduction of the use of products that are harmful to the environment, Reduction of the use of different crops in rotations (including dripping, for controlled deficit irrigation and/or support crops), Conservational Agriculture (for land protection by plant cover, plant cover, ...), Biologic…	0	0	0	1	1	1	0	0	0	1	0	1	0	0	1	0	0	1	1	1
14	Horticultural (vegetable cultivation)	Ecological	Extensive	< 2 hectares	3	No	11 to 20 years	Between 1 and 2 persons	Between 1 and 2 persons	Rental	No	No	Other family	Yes	The agrarian world does not conform with the capitalist model and people flee for lack of vocation	Yes	Those that in a same property balance the social, economic and environmental part	7	7	7	7	7	7	4	6	7	6	6.5	Organic adoba, Biofertilizing (Application of living microorganisms to seeds, plant surfaces or soils), Organic Fertilization (Application of purely organic or mixed with inorganic fertilization), Integration of different crops into rotations (including hedge crops), Creation of plant barriers around their crops, plots or on the same farm, Agroforesteria with wood, fruit trees, or nuts (Agrofores…	1	0	1	1	0	1	1	1	1	0	0	1	0	0	1	0	0	1	0	0
15	Extensive crops (cereals, leguminous plants, fodder, ornamental, hop and so on)	Conventional	Extensive	> 70 hectares	6	Yes	More than 50 years (all my life)	Between 11 to 15 persons	Between 1 and 2 persons	Family	Yes	No	Brother/s or sister/s and other family	Yes	Little investment in the sector and in the territory where the primary sector is more common. This makes it less attractive and young people go to the cities to look for work	Yes	Go from having a conventional farm to an ecological one	2	2	2	2	2	3	2	3	7	7	3.2	Split Fertilization (Application of chemical and organic fertilizers with various operations), Organic Fertilization (Application of purely organic fertilization or mixed with inorganic fertilization), Reduction of the use of products that are harmful to the environment, Integration of different crops into rotations (including hedge crops), Polyculatives. Diversification of arable species on the …	0	1	0	1	1	1	0	0	1	1	0	1	1	0	0	0	0	0	1	1
16	Fruit trees (fruit cultivation)	Conventional	Intensive	11 to 15 hectares	5	Yes	11 to 20 years	Between 1 and 2 persons	Between 6 to 10 persons	Family	Yes	Yes	Father and / or mother	Yes	The low prices	Yes	Use of environmentally friendly techniques	5	5	6	7	6	5	4	1	1	1	4.1	Organic fertilizer production, Split Fertilization (Application of chemical and organic fertilizers with various operations), Reduction of the use of harmful products for the environment, Reg of crops (by drip, controlled deficit irrigation and/or support), Conservation Agriculture (land protection through land cover with plant remains of a previous crop, plant cover, ...), Biological pest contro…	1	1	0	1	0	0	0	0	0	1	0	1	0	0	1	0	0	0	0	0
17	Fruit trees (fruit cultivation)	Conventional	Intensive	6 to 10 hectares	4	No	41 to 50 years	Between 1 and 2 persons	Between 3 to 5 persons	Family	Yes	Yes	Father and / or mother	No	The generational problem is a direct consequence of the fruit prices	No	Beneficial practices for the environment	2	2	3	3	3	3	3	2	4	6	3.1	Reduction of the use of products that are harmful to the environment, Reg de las cultivars (for drip, for controlled deficit irrigation and/or support), Use of crops that are resistant to any stress or crop with selected features that improve the activities of the rhizosphere (e.g., mycorizes, rizobacteria that promote plant growth)., Conservation agriculture (land protection by covering plant re…	0	0	0	0	1	0	0	0	0	1	1	1	0	0	1	0	0	0	0	0
18	Extensive crops (cereals, leguminous plants, fodder, ornamental, hop and so on)	Conventional	Intensive	31 to 70 hectares	4	No	11 to 20 years	More than 20 persons	More than 20 persons	Family	Yes	Yes	Father and / or mother	Yes	Many members of the cooperative are family farms and have no continuity in the children	No	Cultivation taking into account and maintaining ecosystem services	5	3	3	3	3	3	4	5	5	5	3.9	Reducció de l'ús de productes nocius per al medi ambient, Reg de cultius (per degoteig, per reg deficitari controlat i / o de suport), Control biològic de plagues (Control de males herbes, plagues i malalties basades en la introducció d'enemics naturals, feromones, ...), Utilització de pesticides naturals / pesticides botànics derivats de plantes o extractes de plantes.	0	0	0	0	1	0	0	0	0	1	0	0	0	0	1	1	0	0	0	0
19	Horticultural (vegetable cultivation)	Conventional	Intensive	3 to 5 hectares	5	Yes	21 to 30 years	Between 1 and 2 persons	Between 3 to 5 persons	Rental and family	No	Yes	Other family	Yes	The difficulty of living in the countryside	Yes	Do not use chemicals	6	5	5	6	6	5	6	6	6	4	5.5	Split Fertilization (Application of chemical and organic fertilizers with various operations), Biofertilizing (Application of living microorganisms to seeds, plant surfaces or soils), Reduction of the use of products that are harmful to the environment, Reg of crops (for drip, for controlled deficit irrigation and/or support), Use of crops that are resistant to any stress or crop with selected fe…	0	1	1	0	1	0	0	0	0	1	1	0	0	0	1	1	0	0	1	0
20	Horticultural (vegetable cultivation)	Ecological	Extensive	3 to 5 hectares	4	No	41 to 50 years	Between 3 to 5 persons	Between 1 and 2 persons	Rental	Yes	Yes	Other family	Yes	my daughter does not want to continue with the exploitation.	Yes	Organic farming without certification.	7	7	7	7	7	7	7	7	7	7	7	Organic adobe production, Biofertilizing (Application of living microorganisms to seeds, plant surfaces or soils), Organic Fertilization (Application of purely organic fertilization or mixed with inorganic fertilization), Reduction of the use of products that are harmful to the environment, Integration of different crops into rotations (including hedge crops), Creation of plant barriers around th…	1	0	1	1	1	1	1	0	1	1	1	0	1	1	1	0	1	1	0	0
21	Extensive crops (cereals, leguminous plants, fodder, ornamental, hop and so on)	Ecological	Extensive	11 to 15 hectares	4	No	21 to 30 years	Between 1 and 2 persons	Between 6 to 10 persons	Rental	Yes	Yes	Father and / or mother	Yes	New generations tend to want to live in big cities and work from an office. It is often forgotten that the primary sector is essential.	Yes	Practices that move away from chemicals and enhance natural resources to optimize crops / farms.	4	5	4	4	2	2	2	5	5	5	3.8	Organic fertilizer production, divided Fertilization (Application of chemical and organic fertilizers with various operations), Biofertilizing (Application of living microorganisms to seeds, plant surfaces or soils), organic Fertilization (Application of purely organic fertilization or mixed with inorganic fertilization), Reduction of the use of products harmful to the environment, Polycultures. …	1	1	1	1	1	0	0	1	1	0	0	1	1	1	0	0	1	1	1	0
22	Fruits and vegetables	Ecological	Extensive	3 to 5 hectares	2	Yes	0 to 10 years	Between 1 and 2 persons	Between 1 and 2 persons	Rental	No	No	Other family	Yes	Professionalization.	Yes	Harmony between speeds and biological chromatism.	3	3	5	5	5	2	2	1	2	2	3	Reducing the use of products that are harmful to the environment, creating plant barriers around their crops, plots or the same farm, Agroforesteria with wood, fruit trees or new ones (Settlement of systems that combine organic farming with forestry systems through indigenous tree plantations both inside and outside the farm), Polycultivation. Diversification of arable species on the same farm, E…	0	0	0	0	1	1	1	1	0	0	0	0	1	0	0	0	0	0	0	1
23	Horticultural (vegetable cultivation)	Conventional	Intensive	3 to 5 hectares	3	No	41 to 50 years	Between 1 and 2 persons	Between 1 and 2 persons	Rental	No	Yes	Brother/s or sister/s and son/s or daughter/s	Yes	Poor performance and low social consideration	Yes	Cultivate with care for the environment and without compromising the health of customers	4	4	4	4	4	4	4	4	4	4	4	Split Fertilization (Application of chemical and organic fertilizers with various operations), Biofertilizing (Application of living microorganisms to seeds, plant surfaces or soils), Reduction of the use of products that are harmful to the environment, Integration of different crops into rotations (including hedge crops), Creation of plant barriers around their crops, plots or the same exploitat…	0	1	1	0	1	1	1	0	1	1	1	0	0	0	1	0	0	1	0	1
24	Extensive crops (cereals, leguminous plants, fodder, ornamental, hop and so on)	Ecological	Extensive	11 to 15 hectares	4	No	21 to 30 years	Between 1 and 2 persons	Between 6 to 10 persons	Rental	Yes	Yes	Father and / or mother	Yes	New generations tend to want to live in big cities and work from an office. It is often forgotten that the primary sector is essential.	Yes	Practices that move away from chemicals and enhance natural resources to optimize crops / farms.	4	5	4	4	2	2	2	5	5	5	3.8	Organic fertilizer production, divided Fertilization (Application of chemical and organic fertilizers with various operations), Biofertilizing (Application of living microorganisms to seeds, plant surfaces or soils), organic Fertilization (Application of purely organic fertilization or mixed with inorganic fertilization), Reduction of the use of products harmful to the environment, Polycultures. …	1	1	1	1	0	0	0	1	1	0	0	1	1	1	0	0	1	0	1	1
25	Horticultural (vegetable cultivation)	Conventional	Extensive	< 2 hectares	4	Yes	0 to 10 years	Between 1 and 2 persons	Between 1 and 2 persons	Concession (lucrative)	No	Yes	Other family	Yes	The job is not well paid, in terms of money and hours. There is a discredit of the sector	Yes	Agricultural practices following the regulations of the CCPAE	7	6	6	7	6	7	6	4	6	6	6.1	Split Fertilization (Application of chemical and organic fertilizers with various operations), Biofertilizing (Application of living microorganisms to seeds, plant or soil surfaces), Integrating of different crops on rotations (including hedge crops), Creating plant barriers around their crops, plots or on the same farm, Agroforesteria with wood, fruit trees or nuts (Agroforesteria with woodworki…	0	1	0	0	1	1	1	1	0	0	1	1	0	0	0	0	1	0	0	0
26	Extensive crops (cereals, leguminous plants, fodder, ornamental, hop and so on)	Conventional	Extensive	6 to 10 hectares	2	No	0 to 10 years	Between 1 and 2 persons	Between 3 to 5 persons	Family	No	No	Son/s or daughter/s and other family	Yes	Bureaucratic complications, high taxes, lack of technicalization and both economic and social valuation of the sector.	Yes	Contribute value and deal with the daily casuistry of the exploitation Enhancing the natural processes of defense of crops	5	5	4	5	5	6	6	5	3	6	5	Organic Fertilization (Application of purely organic fertilization or mixed with inorganic fertilization), Reduction of the use of products that are harmful to the environment, Reg of crops (for dripping, for controlled deficit irrigation and/or support), Availment of land-based organisms (to promote land-based biological activity to increase crop yields and promote land health), Effective handli…	0	0	0	1	1	0	0	0	0	1	0	0	0	0	0	0	0	1	1	0
27	Fruits and vegetables, vineyard and nuts	Conventional	Extensive	6 to 10 hectares	4	Yes	11 to 20 years	Between 3 to 5 persons	Between 1 and 2 persons	Family	Yes	No	Father and / or mother and brother/s or sister/s	Yes	The lack of value of field work	Yes	Relationship between stable and harmonious crops and nature without the need to do nonsense such as the goat's horn and manure	7	7	7	7	7	7	7	7	7	7	7	Split Fertilization (Application of chemical and organic fertilizers with various operations), Organic Fertilization (Application of purely organic fertilization or mixed with inorganic fertilization), Integration of different crops into rotations (including hedge cultivation), Polycultures. Diversification of cultivable species on the same farm, Conservation Agriculture (land protection by cover…	0	1	0	1	0	1	0	0	1	0	0	1	0	0	1	0	0	1	1	1
28	Horticultural (vegetable cultivation)	Conventional	Extensive	6 to 10 hectares	6	No	21 to 30 years	Between 1 and 2 persons	Between 1 and 2 persons	Family	Yes	Yes	Father and / or mother	Yes	Because it is a very hard and very sacrificed job	No	Respecting the environment	2	2	3	3	3	4	4	5	4	4	3.4	Organic fertilizer production, Split Fertilization (Application of chemical and organic fertilizers with various operations), Biofertilization (Application of purely organic or mixed with inorganic fertilization), Organic Fertilization (Application of exclusively organic or mixed with inorganic fertilization), Reduction of the use of different crops in rotations (including hedge cultivation), Reg…	1	1	1	1	1	0	0	1	0	0	0	1	0	0	0	0	1	0	0	0
29	Vineyard	Ecological	Intensive	11 to 15 hectares	7	No	31 to 40 years	Between 1 and 2 persons	Between 1 and 2 persons	Rental and family	No	Yes	Father and / or mother	Yes	Costs higher than the price paid for the product	Yes	Environmentally friendly	6	7	7	4	4	5	4	2	3	3	4.5	Organic Fertilization (Application of purely organic fertilization or mixed with inorganic fertilization), Conservation Agriculture (land protection through land cover with plant remains of a previous crop, plant cover, ...), Removal of synthetic chemical pesticides, Biological Pest Control (Control of weeds, pests and diseases based on the introduction of natural enemies, pheromones, ...)	0	0	0	1	0	0	0	0	0	0	0	1	0	1	1	0	0	0	0	0
30	Extensive crops (cereals, leguminous plants, fodder, ornamental, hop and so on)	Conventional	Intensive	< 2 hectares	4	No	31 to 40 years	Between 1 and 2 persons	Between 6 to 10 persons	Family	No	No	Brother/s or sister/s	Yes	It happens a lot from parents to children	No	It is complicated with ornamental	1	1	1	1	1	1	1	1	1	1	1	Organic fertilizers production	1	0	0	0	0	0	0	0	0	0	0	0	0	0	0	0	0	0	0	0
[truncated: 147 more columns]
